# Supplementary material for: Chlorination of florfenicol (FF): reaction kinetics, influencing factors and by-products formation
Source: Royal Society of Chemistry journal article supplement (doi:10.1039/c6ra23342b), 2016-01-01

## Supplementary Information

for

Chlorination of florfenicol (FF): Reaction kinetics, influence factors and by-products formation

Yansen Zhang<sup>a</sup>, Yisheng Shao<sup>a,b,\*</sup>, Naiyun Gao<sup>a</sup>, Wenhai Chu<sup>a</sup>, Juxiang Chen<sup>a</sup>, Shuo Li<sup>a</sup>, Yue

Wang<sup>a</sup>, Shuaixian Xu<sup>a</sup>

<sup>a</sup> State Key Laboratory of Pollution Control Reuse, Tongji University, Shanghai 200092, China

<sup>b</sup> China Academy of Urban Planning and Design, Beijing 100037, China

\*Corresponding author: Yisheng Shao. Tel.: +86-21265982691.

E-mail address: shaoyisheng2014@126.com

**Fig. S1.** The LC-MSMS scan of byproducts formed during the chlorination of FF with the mass/ionization ( $m/z$ ) values of 391.5

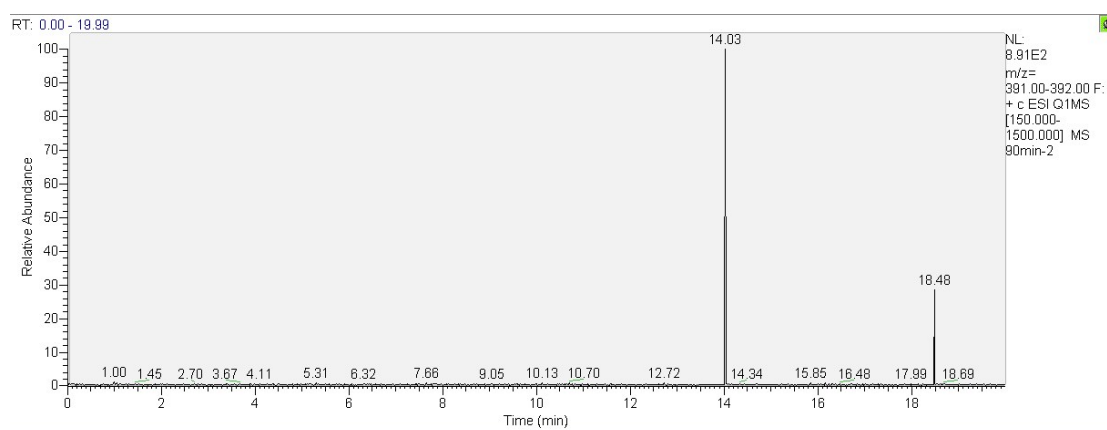

**Fig. S2.** The LC-MSMS scan of byproducts formed during the chlorination of FF with the mass/ionization ( $m/z$ ) values of 391.5

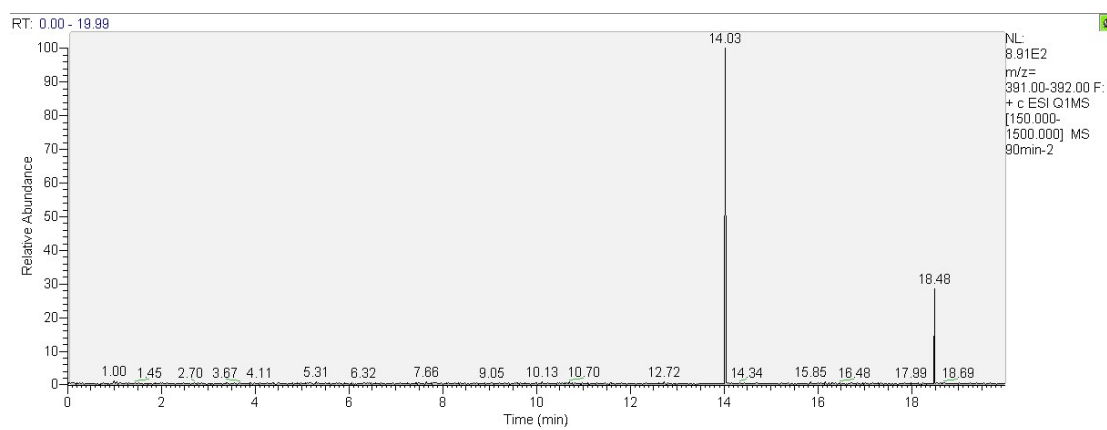

**Fig. S3.** The LC-MSMS scan of byproducts formed during the chlorination of FF with the mass/ionization ( $m/z$ ) values of 426

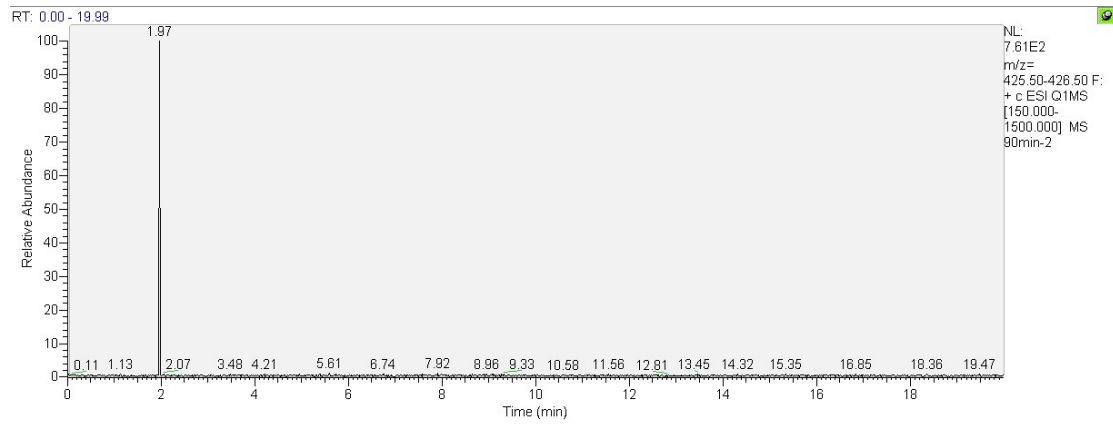

**Fig. S4.** The LC-MSMS scan of byproducts formed during the chlorination of FF with the mass/ionization ( $m/z$ ) values of 460.5

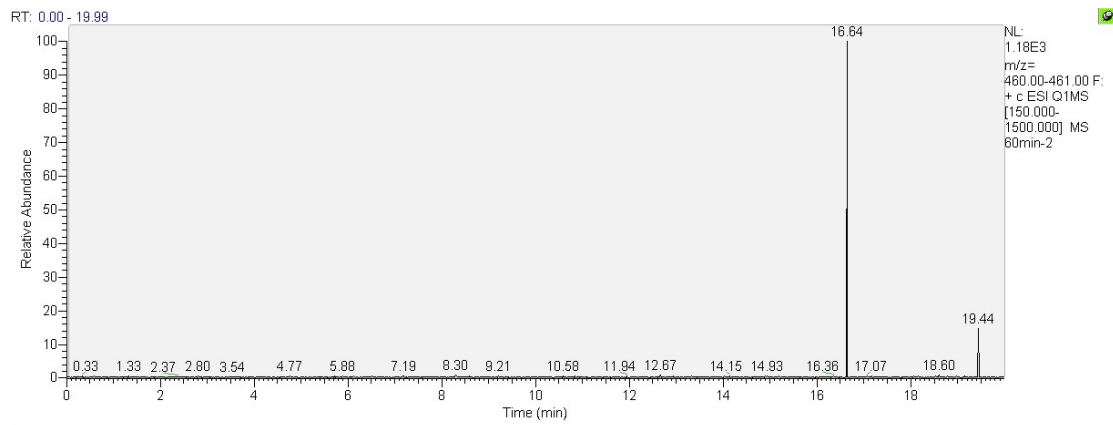

**Fig. S5.** The LC-MSMS scan of byproducts formed during the chlorination of FF with the mass/ionization ( $m/z$ ) values of 460.5

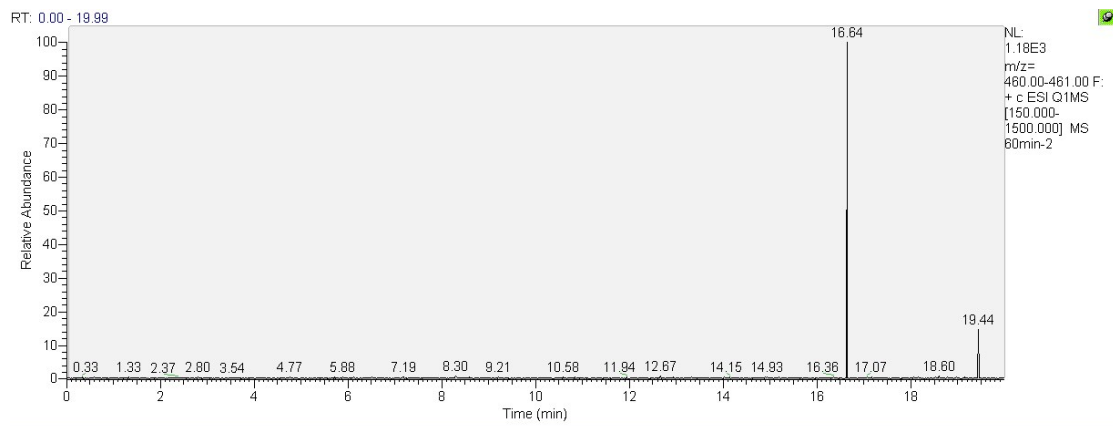

**Fig. S6.** The LC-MSMS scan of byproducts formed during the chlorination of FF with the mass/ionization ( $m/z$ ) values of 460.5

values of 495

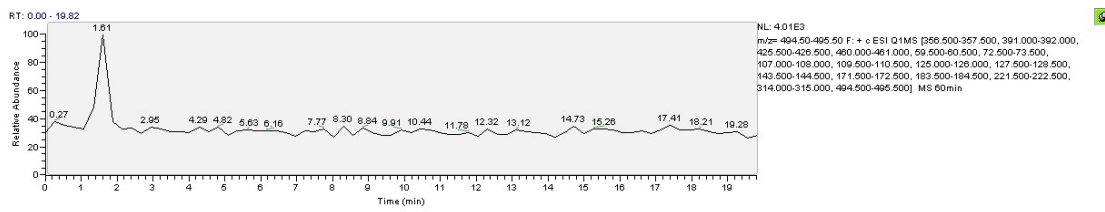

**Fig. S7.** The LC-MSMS scan of byproducts formed during the chlorination of FF with the mass/ionization ( $m/z$ ) values of 314.5

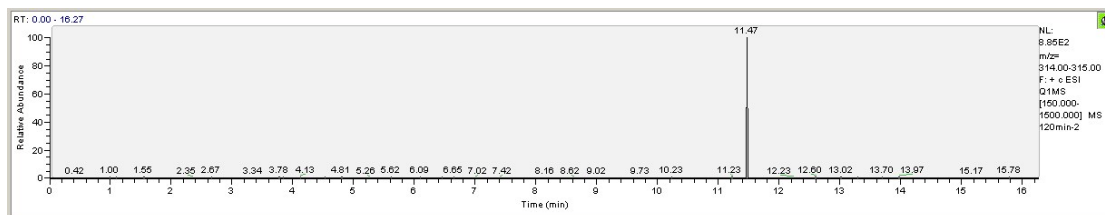

**Fig. S8.** The LC-MSMS scan of byproducts formed during the chlorination of FF with the mass/ionization ( $m/z$ ) values of 349

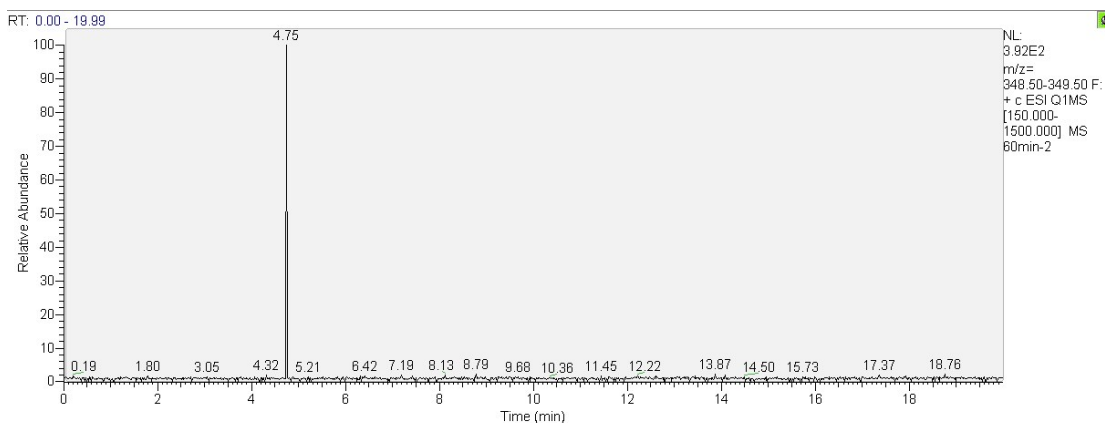

**Fig. S9.** The LC-MSMS scan of byproducts formed during the chlorination of FF with the mass/ionization ( $m/z$ ) values of 383.5

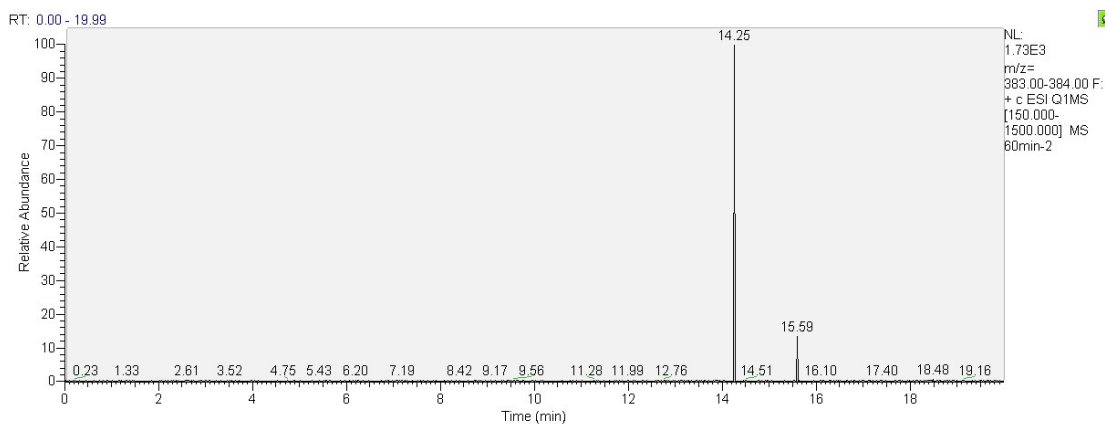

**Fig. S10.** The LC-MSMS scan of byproducts formed during the chlorination of FF with the mass/ionization ( $m/z$ ) values of 452.5

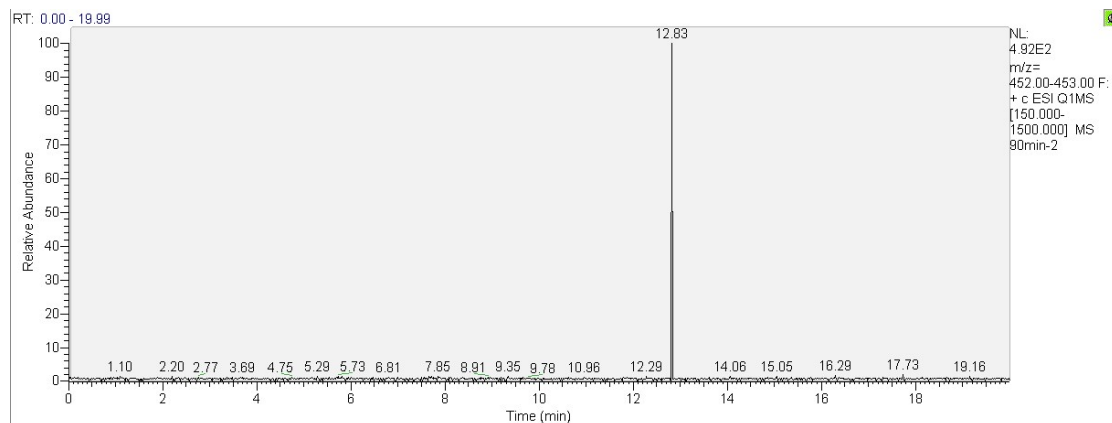

**Fig. S11.** The LC-MSMS scan of byproducts formed during the chlorination of FF with the mass/ionization ( $m/z$ ) values of 248

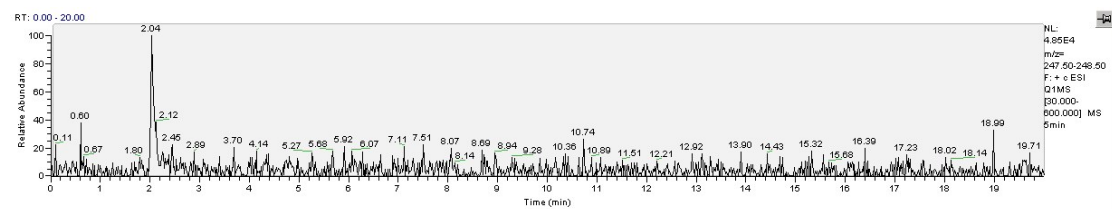

**Fig. S12.** The LC-MSMS scan of byproducts formed during the chlorination of FF with the mass/ionization ( $m/z$ ) values of 282.5

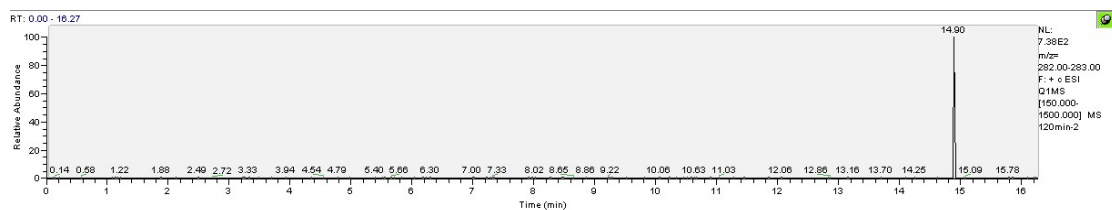

**Fig. S13.** The LC-MSMS scan of byproducts formed during the chlorination of FF with the mass/ionization ( $m/z$ ) values of 317

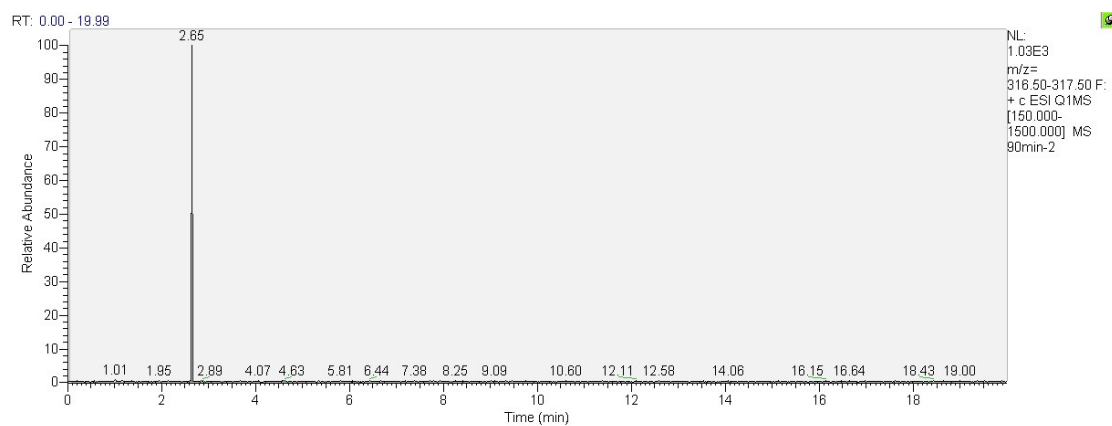

**Fig. S14.** The LC-MSMS scan of byproducts formed during the chlorination of FF with the mass/ionization ( $m/z$ ) values of 351.5

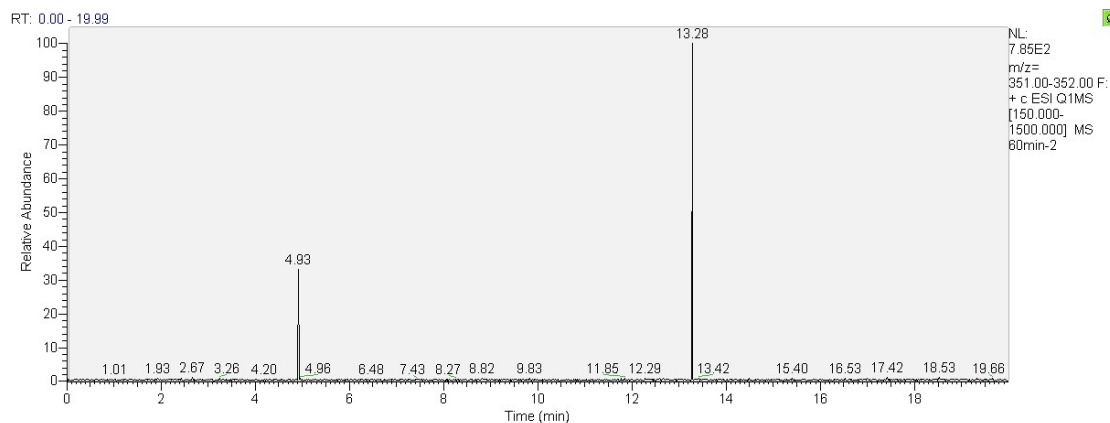

**Fig. S15.** The LC-MSMS scan of byproducts formed during the chlorination of FF with the mass/ionization ( $m/z$ ) values of 387

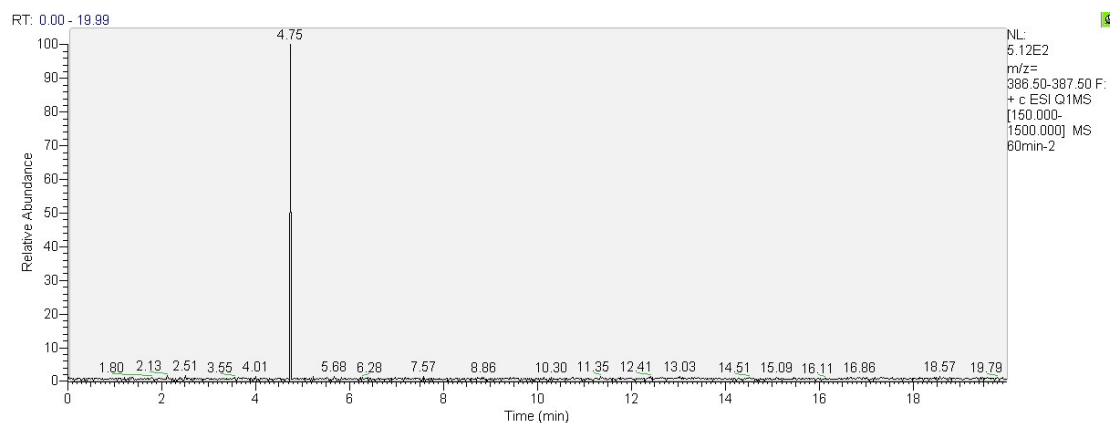

**Fig. S16.** The LC-MSMS scan of byproducts formed during the chlorination of FF with the mass/ionization ( $m/z$ ) values of 279

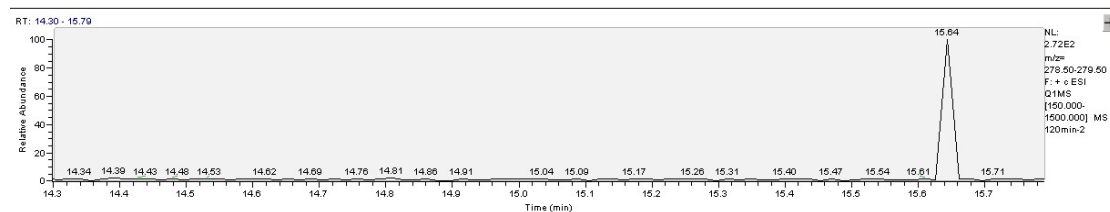

**Fig. S17.** The LC-MSMS scan of byproducts formed during the chlorination of FF with the mass/ionization ( $m/z$ ) values of 96

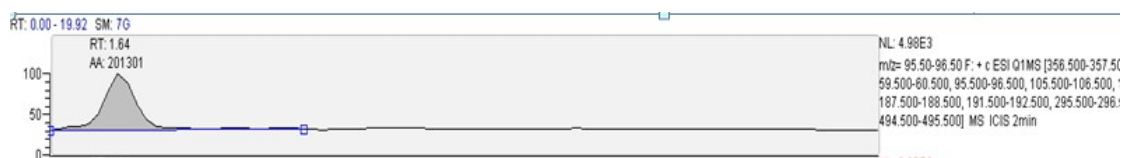

**Fig. S18.** The LC-MSMS scan of byproducts formed during the chlorination of FF with the mass/ionization ( $m/z$ ) values of 184

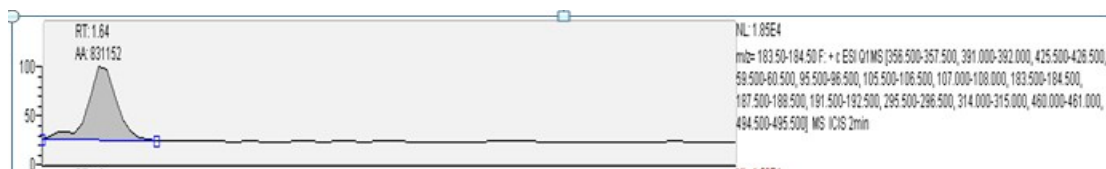

**Fig. S19.** The LC-MSMS scan of byproducts formed during the chlorination of FF with the mass/ionization ( $m/z$ ) values of 188

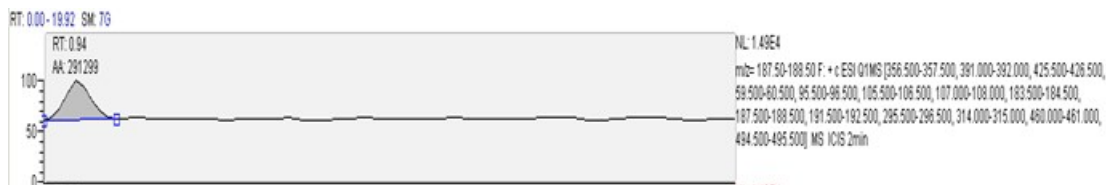

**Fig. S20.** The LC-MSMS scan of byproducts formed during the chlorination of FF with the mass/ionization ( $m/z$ ) values of 106

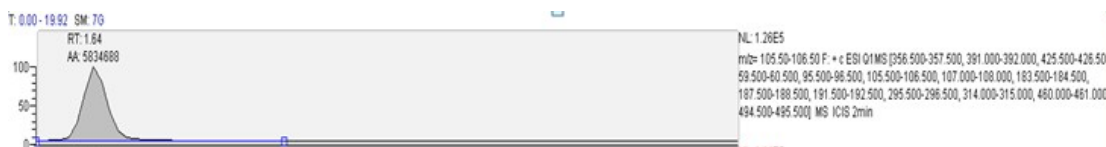

**Fig. S21.** The LC-MSMS scan of byproducts formed during the chlorination of FF with the mass/ionization ( $m/z$ ) values of 122

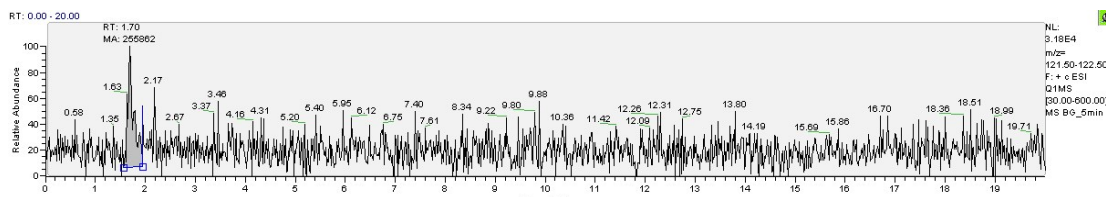

Supplement: c6ra23342b1.pdf [file c6ra23342b1.pdf]
